# Supplementary material for: Effects of nutritional and ambient oxygen condition on biofilm formation in Mycobacterium avium subsp. hominissuis via altered glycolipid expression
Source: PubMed Central journal article supplement (PMC5290538; doi:10.1038/srep41775), 2017-02-03
Supplement: srep41775-s1.pdf [file srep41775-s1.pdf]

## **Supplementary Data**

**Effects of nutritional and ambient oxygen condition on biofilm formation in**

***Mycobacterium avium* subsp. *hominissuis* via altered glycolipid expression**

Takahiro Totani, Yukiko Nishiuchi, Yoshitaka Tateishi, Yutaka Yoshida, Hiromi Kitanaka,

Mamiko Niki, Yukihiro Kaneko, and Sohkiichi Matsumoto

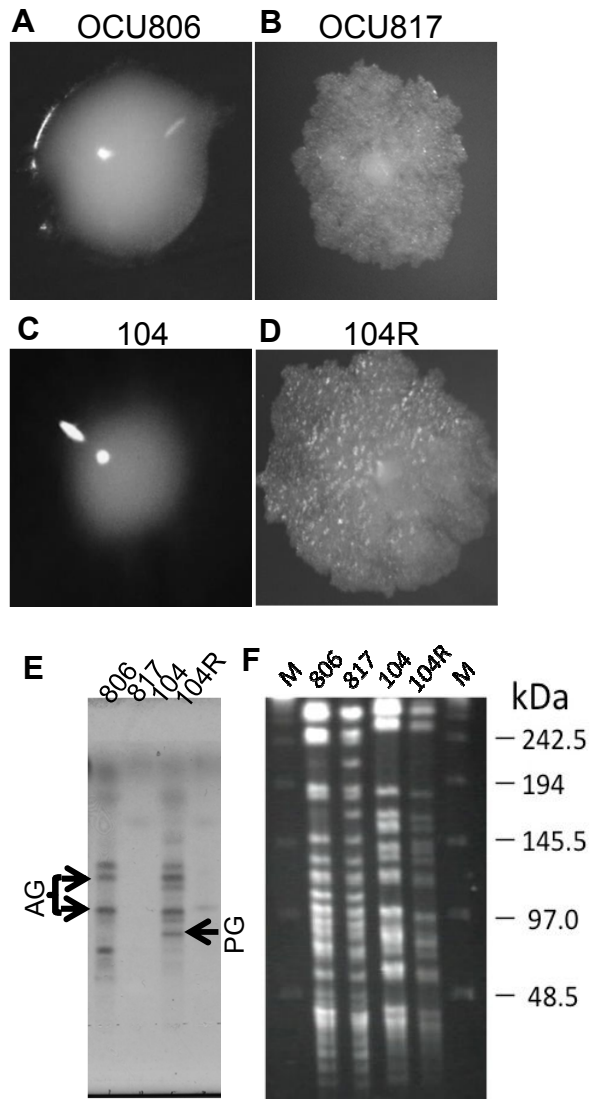

**Supplementary Fig. S1. Confirmation of MAH rough mutant characteristics.** (A-D) Colony morphologies of MAH OCU806, MAH OCU817, MAH 104, MAH 104R grown on Middlebrook 7H11 agar plates containing 0.5% glycerol, 0.06 % oleic acid and 10% ADC enrichment. (E) Lack of GPL production in rough mutants on TLC. AG = apolar GPLs, PG = polar GPLs. MAH OCU806 does not have PG. (F) Confirmation of the same genotype between rough mutants and wild-type strains by pulse-field gel electrophoresis. Genomic DNA was digested by *Xba*I.

| Strain ID | Isolation source <sup>a</sup> | Colony morphology <sup>b</sup> | Pellicle formation ability |                    |                   |                    |
|-----------|-------------------------------|--------------------------------|----------------------------|--------------------|-------------------|--------------------|
|           |                               |                                | Day 14                     |                    | Day 32            |                    |
|           |                               |                                | 5% O <sub>2</sub>          | 5% CO <sub>2</sub> | 5% O <sub>2</sub> | 5% CO <sub>2</sub> |
| OCU401    | BW                            | Sm                             | –                          | –                  | –                 | –                  |
| OCU433    | BW                            | Sm                             | –                          | –                  | +                 | –                  |
| OCU446    | BW                            | R                              | –                          | –                  | –                 | –                  |
| OCU447    | SH                            | Sm                             | –                          | –                  | –                 | –                  |
| OCU526    | BI                            | Sm                             | –                          | –                  | –                 | –                  |
| OCU663    | DO                            | Sm                             | +                          | –                  | +                 | –                  |
| OCU664    | BI                            | Sm                             | +                          | –                  | +                 | –                  |
| OCU666    | BW                            | Sm                             | –                          | –                  | +                 | –                  |
| OCU752    | BI                            | Sm                             | –                          | –                  | +                 | –                  |
| OCU681    | BW                            | Sm                             | +                          | –                  | +                 | +                  |
| OCU746    | SH                            | Sm                             | +                          | –                  | +                 | +                  |
| OCU748    | BW                            | Sm                             | +                          | –                  | +                 | –                  |
| OCU792    | BI                            | Sm                             | +                          | –                  | +                 | +                  |
| OCU797    | SH                            | Sm                             | +                          | –                  | +                 | –                  |
| OCU798    | BI                            | Sm                             | +                          | –                  | +                 | +                  |
| OCU801    | BI                            | Sm                             | +                          | –                  | +                 | –                  |
| OCU806    | BI                            | Sm                             | +                          | –                  | +                 | +                  |

**Supplementary Table S1. The property of environmental MAH isolates and profiles of pellicle formation ability in hypoxia and hypercapnia.** Pellicle formation was assayed in 24-well plastic plates in 17 environmental isolates from bathrooms of MAC lung disease patients.

<sup>a</sup> BW: bathtub water, SH: showerhead, BI: bathtub inlet, DO: drain outlet.

<sup>b</sup> Sm: smooth, R: rough.

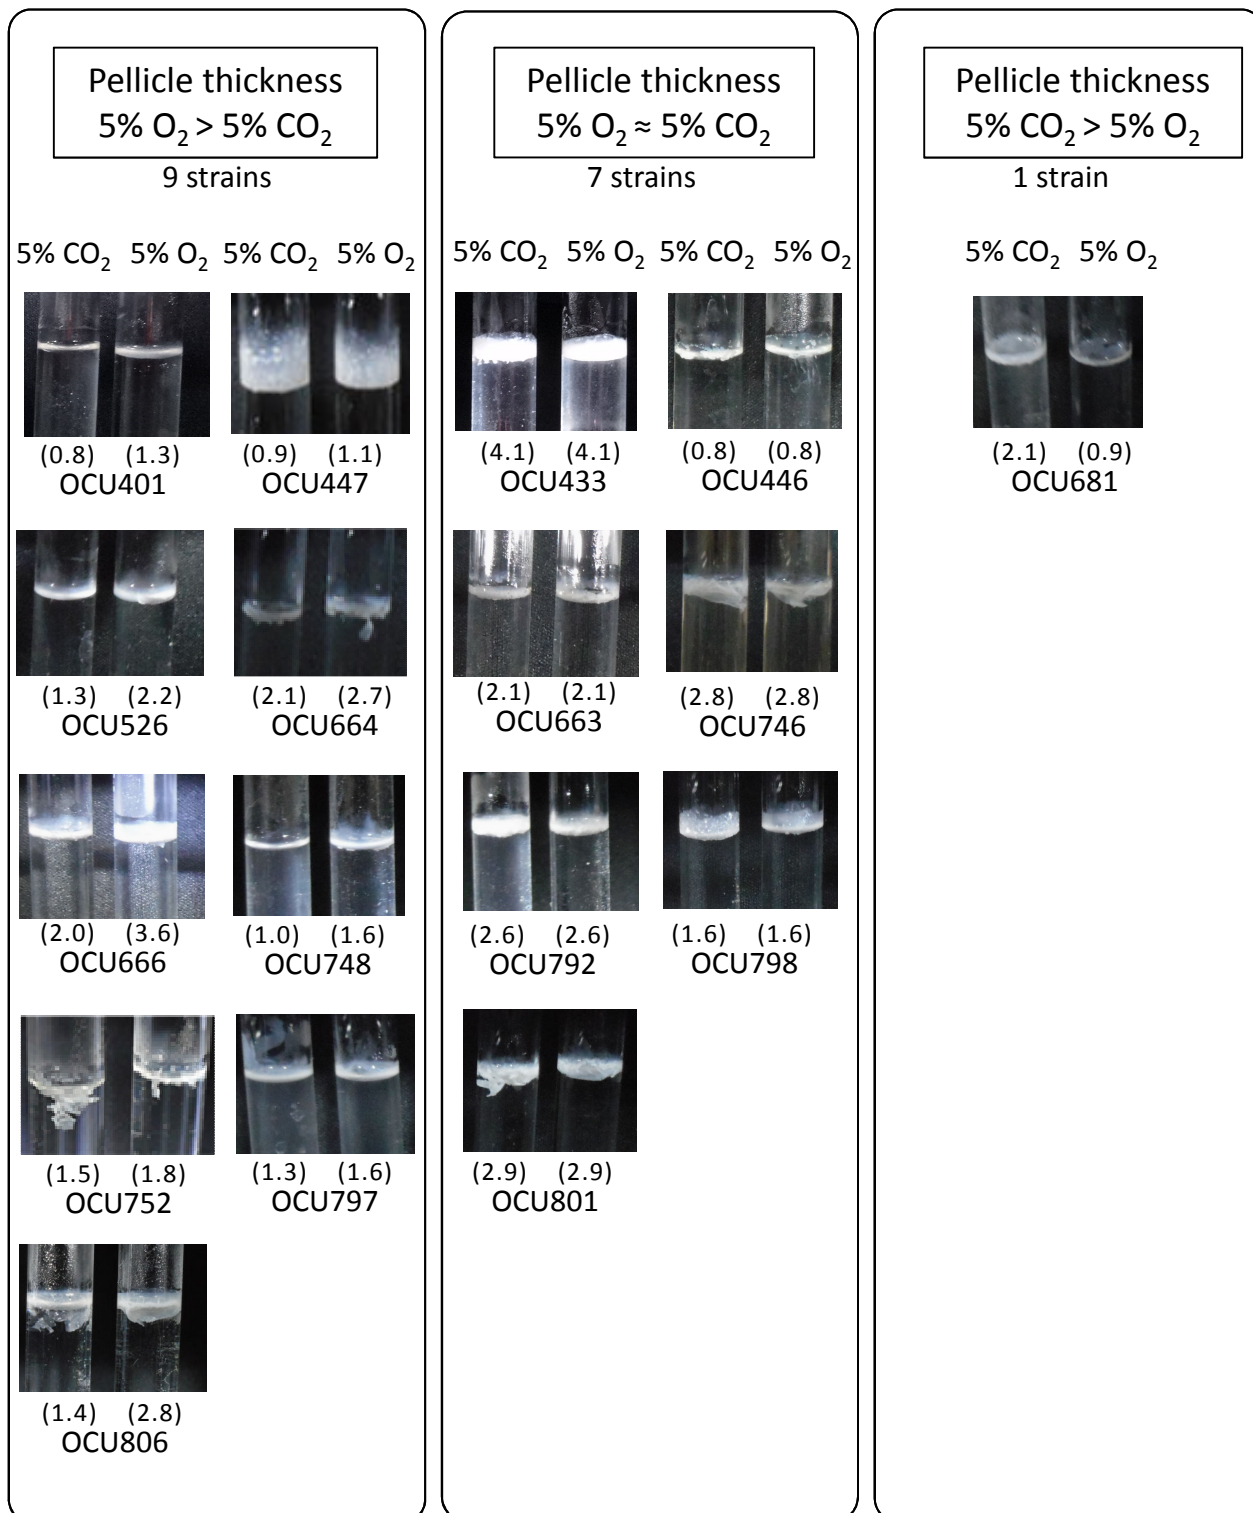

**Supplementary Fig. S2. Comparison of pellicle thickness formed on air-liquid interface by 17 environmental MAH isolates between hypoxic and hypercapnic conditions in glass tubes.** The MAH isolates were cultured for 2 weeks in 7H9Eut. Numbers in parenthesis indicate the thickness of pellicles (unit: mm).

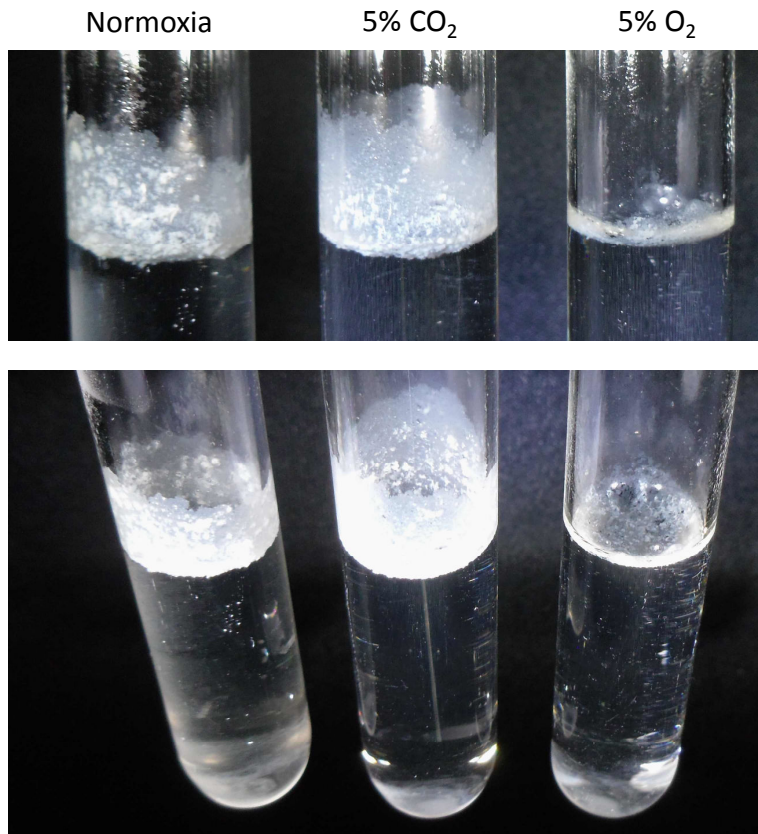

**Supplementary Fig. S3. Enhancement of pellicle formation under hypercapnia but not under hypoxia in *M. bovis* bacillus Calmette-Guérin (BCG) Pasteur by 4-week culture in 7H9Eut.**

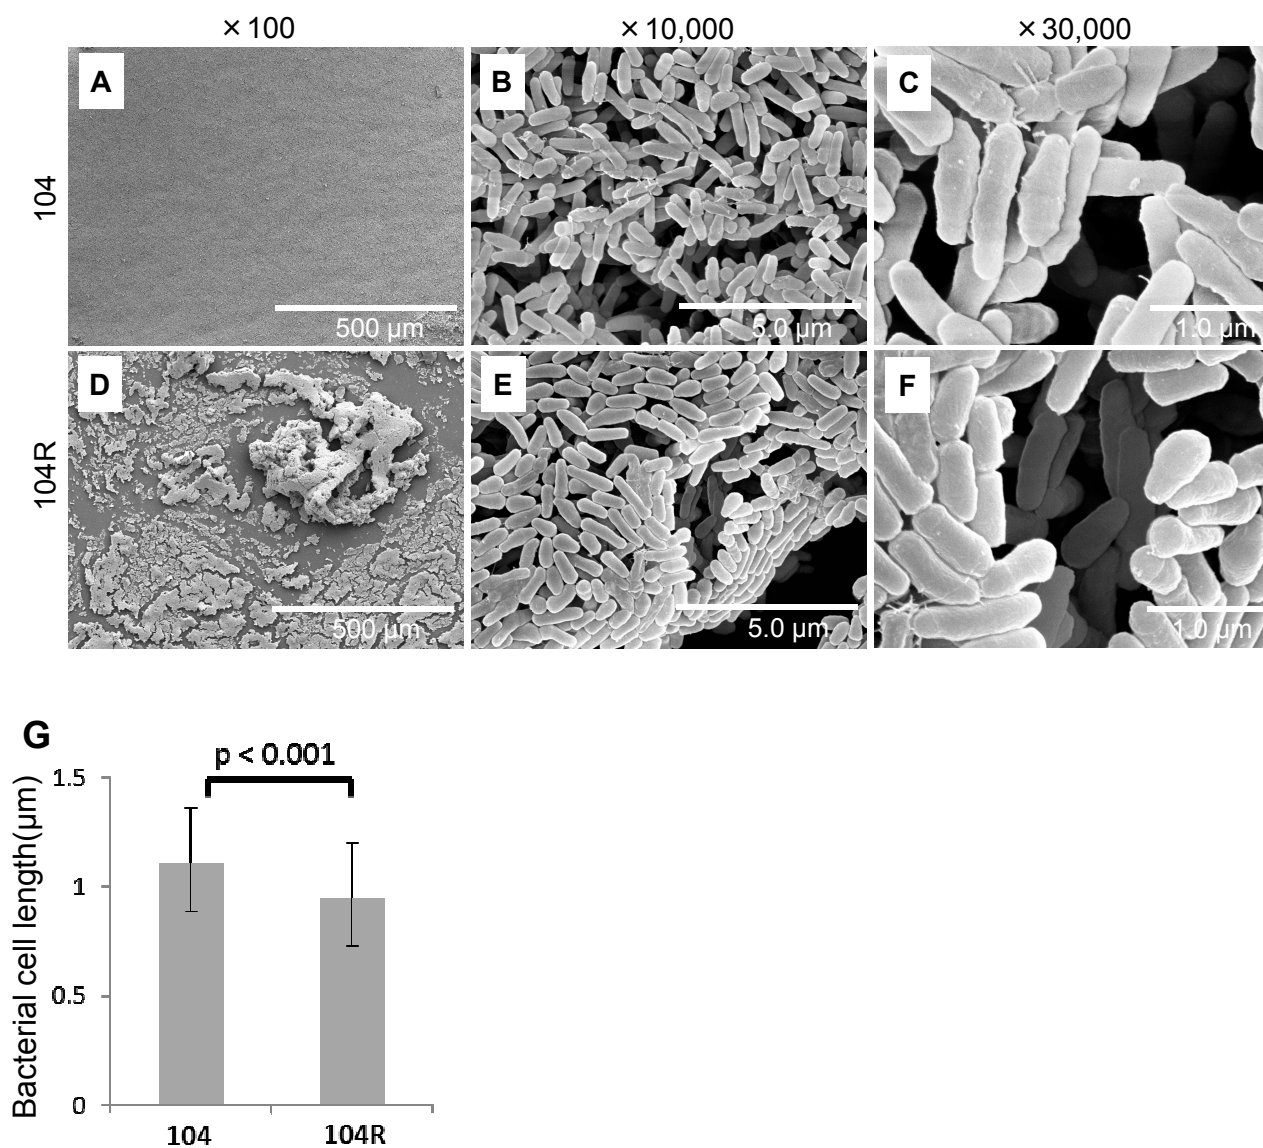

**Supplementary Fig. S4. Ultrastructure of pellicles formed by MAH 104 and MAH 104R.** (A–F) Pellicles were formed on air-liquid interface of 7H9Eut medium under 5%  $\text{O}_2$  condition and 3-week-old pellicles were sampled for SEM observation. (G) Comparison of the length of the major axis of bacterial cells between MAH 104 and MAH 104R. Data were designated as means  $\pm$  S.D. (n = 50).

Inspector A

|          | OCU806 | OCU817 |
|----------|--------|--------|
| skew (+) | 76     | 7      |
| skew (-) | 17     | 89     |

$$\chi^2 = 103.246, df = 1, P < 0.01$$

|          | 104 | 104R |
|----------|-----|------|
| skew (+) | 73  | 16   |
| skew (-) | 27  | 72   |

$$\chi^2 = 54.247, df = 1, P < 0.01$$

Inspector B

|          | OCU806 | OCU817 |
|----------|--------|--------|
| skew (+) | 96     | 32     |
| skew (-) | 24     | 77     |

$$\chi^2 = 80.364, df = 1, P < 0.01$$

|          | 104 | 104R |
|----------|-----|------|
| skew (+) | 99  | 27   |
| skew (-) | 21  | 98   |

$$\chi^2 = 88.481, df = 1, P < 0.01$$

Inspector C

|          | OCU806 | OCU817 |
|----------|--------|--------|
| skew (+) | 68     | 19     |
| skew (-) | 27     | 77     |

$$\chi^2 = 49.565, df = 1, P < 0.01$$

|          | 104 | 104R |
|----------|-----|------|
| skew (+) | 65  | 22   |
| skew (-) | 36  | 74   |

$$\chi^2 = 32.615, df = 1, P < 0.01$$

**Supplementary Fig. S5. Comparison of the alignment of the bacterial cells between wild-type strains and rough mutants in terms of skew position.** Three inspectors who were not informed of the contents of the manuscript selected 12 bacterial cells randomly in the SEM picture ( $\times 10,000$ ), and they individually counted the number of the surrounding cells in skew position and those in non-skew position (parallel or coplanar) evaluated by the direction of the major axis of the cells. The tables are designated as a sum of the counts at the randomly-selected 12 loci in each strain. Chi-square test was performed with Yate's continuity correction to find the difference of proportion of the cells in skew position between wild-type strains and rough mutants. df = degree of freedom.

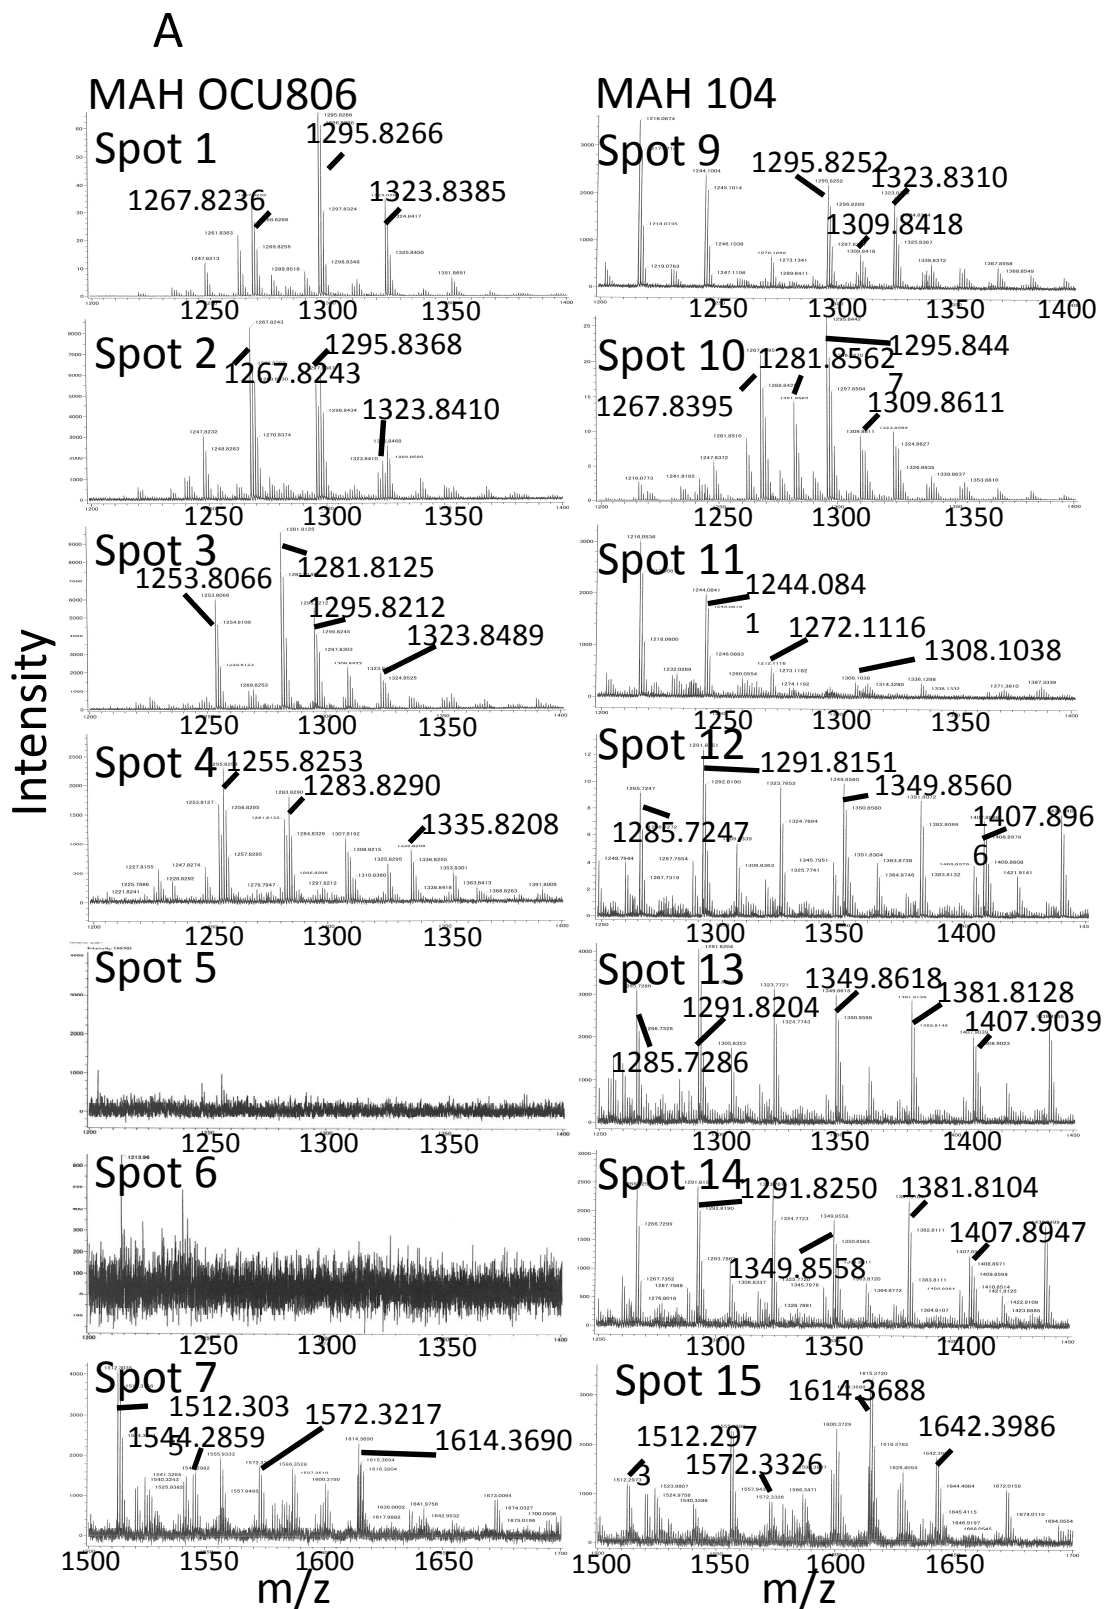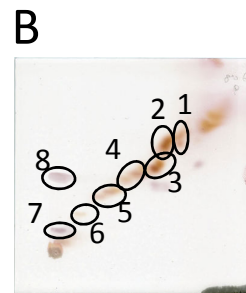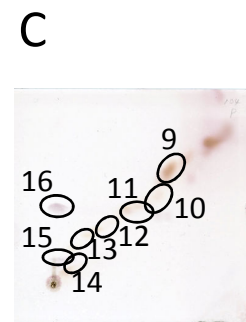

Supplementary Fig. S6.



## Supplementary Fig. S6 (continued)

**D**

| Spot No. | Glycolipid                     | Composition formula                                                | Calculated | Found     | Deviation (ppm) |
|----------|--------------------------------|--------------------------------------------------------------------|------------|-----------|-----------------|
| 1        | Mono- <i>O</i> -acetylated GPL | C <sub>68</sub> H <sub>116</sub> N <sub>4</sub> O <sub>16</sub> Na | 1267.8260  | 1267.8236 | 1.9             |
|          | Di- <i>O</i> -acetylated GPL   | C <sub>69</sub> H <sub>116</sub> N <sub>4</sub> O <sub>17</sub> Na | 1295.8253  | 1295.8266 | 1.0             |
|          | Di- <i>O</i> -acetylated GPL   | C <sub>71</sub> H <sub>120</sub> N <sub>4</sub> O <sub>17</sub> Na | 1323.8546  | 1323.8385 | 12.2            |
| 2        | Mono- <i>O</i> -acetylated GPL | C <sub>68</sub> H <sub>116</sub> N <sub>4</sub> O <sub>16</sub> Na | 1267.8260  | 1267.8243 | 1.3             |
|          | Di- <i>O</i> -acetylated GPL   | C <sub>69</sub> H <sub>116</sub> N <sub>4</sub> O <sub>17</sub> Na | 1295.8253  | 1295.8266 | 1.0             |
|          | Di- <i>O</i> -acetylated GPL   | C <sub>71</sub> H <sub>120</sub> N <sub>4</sub> O <sub>17</sub> Na | 1323.8546  | 1323.8385 | 12.2            |
| 3        | Mono- <i>O</i> -acetylated GPL | C <sub>67</sub> H <sub>114</sub> N <sub>4</sub> O <sub>16</sub> Na | 1253.8128  | 1253.8066 | 4.9             |
|          | Mono- <i>O</i> -acetylated GPL | C <sub>67</sub> H <sub>114</sub> N <sub>4</sub> O <sub>16</sub> Na | 1281.8436  | 1281.8125 | 24.3            |
|          | Di- <i>O</i> -acetylated GPL   | C <sub>69</sub> H <sub>116</sub> N <sub>4</sub> O <sub>17</sub> Na | 1295.8253  | 1295.8212 | 3.2             |
|          | Di- <i>O</i> -acetylated GPL   | C <sub>71</sub> H <sub>120</sub> N <sub>4</sub> O <sub>17</sub> Na | 1323.8546  | 1323.8489 | 4.3             |
| 7        | C80 $\alpha$ -mycoloyl TMM     | C <sub>92</sub> H <sub>176</sub> O <sub>13</sub> Na                | 1512.3009  | 1512.3035 | 1.7             |
|          | C80 wax-mycoloyl TMM           | C <sub>92</sub> H <sub>176</sub> O <sub>15</sub> Na                | 1544.2907  | 1544.2859 | 3.1             |
|          | C82 wax-mycoloyl TMM           | C <sub>94</sub> H <sub>180</sub> O <sub>15</sub> Na                | 1572.3220  | 1572.3217 | 0.2             |
|          | C85 wax-mycoloyl TMM           | C <sub>97</sub> H <sub>186</sub> O <sub>15</sub> Na                | 1614.3689  | 1614.3690 | 0.1             |
| 9        | Di- <i>O</i> -acetylated GPL   | C <sub>69</sub> H <sub>116</sub> N <sub>4</sub> O <sub>17</sub> Na | 1295.8253  | 1295.8252 | 0.1             |
|          | Di- <i>O</i> -acetylated GPL   | C <sub>70</sub> H <sub>118</sub> N <sub>4</sub> O <sub>17</sub> Na | 1309.8381  | 1309.8418 | 2.8             |
|          | Di- <i>O</i> -acetylated GPL   | C <sub>71</sub> H <sub>120</sub> N <sub>4</sub> O <sub>17</sub> Na | 1323.8546  | 1323.8310 | 17.8            |
| 10       | Mono- <i>O</i> -acetylated GPL | C <sub>68</sub> H <sub>116</sub> N <sub>4</sub> O <sub>16</sub> Na | 1267.8260  | 1267.8395 | 10.7            |
|          | Mono- <i>O</i> -acetylated GPL | C <sub>67</sub> H <sub>114</sub> N <sub>4</sub> O <sub>16</sub> Na | 1281.8436  | 1281.8562 | 9.8             |
|          | Di- <i>O</i> -acetylated GPL   | C <sub>69</sub> H <sub>116</sub> N <sub>4</sub> O <sub>17</sub> Na | 1295.8253  | 1295.8447 | 15.0            |
|          | Di- <i>O</i> -acetylated GPL   | C <sub>70</sub> H <sub>118</sub> N <sub>4</sub> O <sub>17</sub> Na | 1309.8381  | 1309.8611 | 17.6            |
| 15       | C80 $\alpha$ -mycoloyl TMM     | C <sub>92</sub> H <sub>176</sub> O <sub>13</sub> Na                | 1512.3009  | 1512.2973 | 2.4             |
|          | C82 wax-mycoloyl TMM           | C <sub>94</sub> H <sub>180</sub> O <sub>15</sub> Na                | 1572.3220  | 1572.3326 | 6.7             |
|          | C85 wax-mycoloyl TMM           | C <sub>97</sub> H <sub>186</sub> O <sub>15</sub> Na                | 1614.3689  | 1614.3688 | 0.1             |
|          | C87 wax-mycoloyl TMM           | C <sub>99</sub> H <sub>190</sub> O <sub>15</sub> Na                | 1642.4002  | 1642.3986 | 1.0             |

**Supplementary Fig. S6. Electron spray ionization mass spectrometry (ESI/MS) of glycolipids on TLC.** (A) ESI/MS spectra of extracted glycolipids. The spots were scraped off and the glycolipids were eluted in chloroform/methanol (2:1, v/v) followed by evaporation using nitrogen gas. The samples were analyzed by ESI/MS by using an ESI probe in the positive ion mode (AccuTOF 4G LC-plus; JEOL, Tokyo, Japan). (B,C) TLC of total lipids extracted from planktonic MAH OCU806 (B) and MAH 104 cells (C). Spots 8 and 16 correspond to TDM as shown in **Supplementary Fig. S7**. (D) Composition formula, calculated mass, found mass, and deviation from calculated mass (ppm) of GPLs and TMMs identified in each spot.

**References**

- Marrakchi H, Lanéelle MA, Daffé M. Mycolic acids: structures, biosynthesis, and beyond. *Chem Biol.* **21**, 67-85 (2014).
- Fujita Y, Okamoto Y, Uenishi Y, Sunagawa M, Uchiyama T, Yano I. Molecular and supra-molecular structure related differences in toxicity and granulomatogenic activity of mycobacterial cord factor in mice. *Microb Pathog.* **43**, 10-21 (2007).

**A**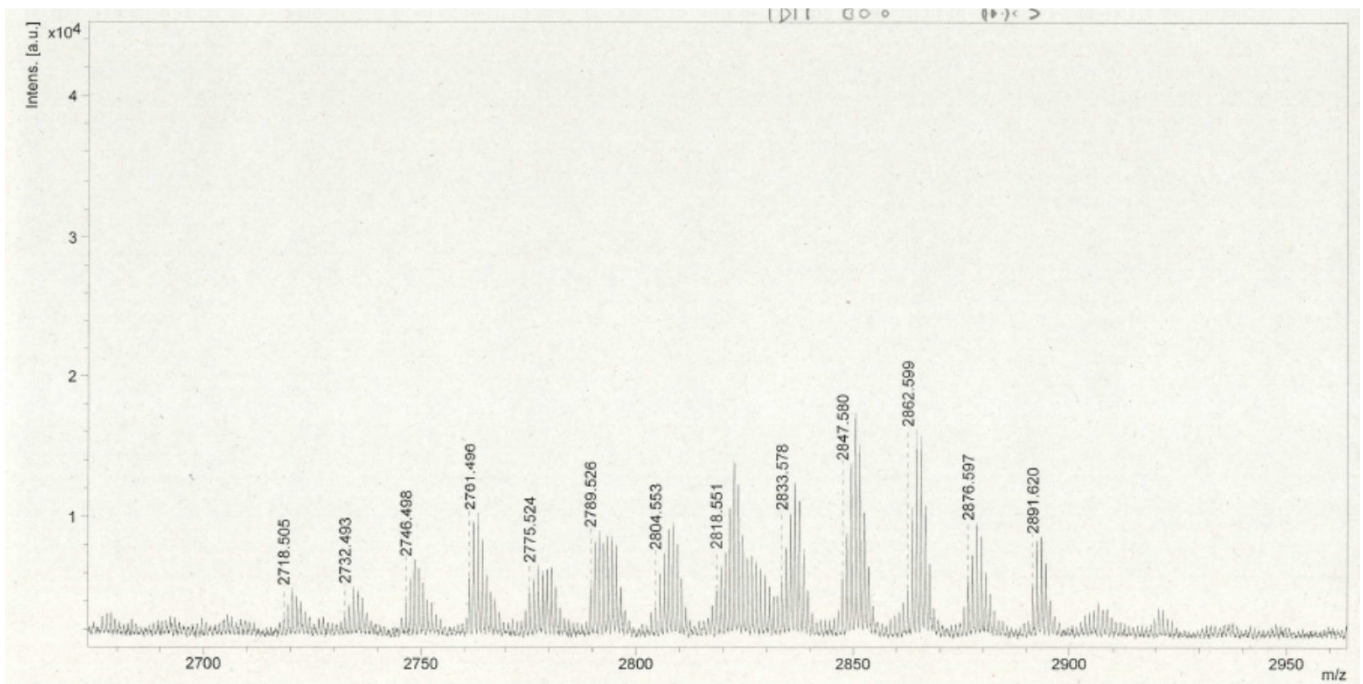**B**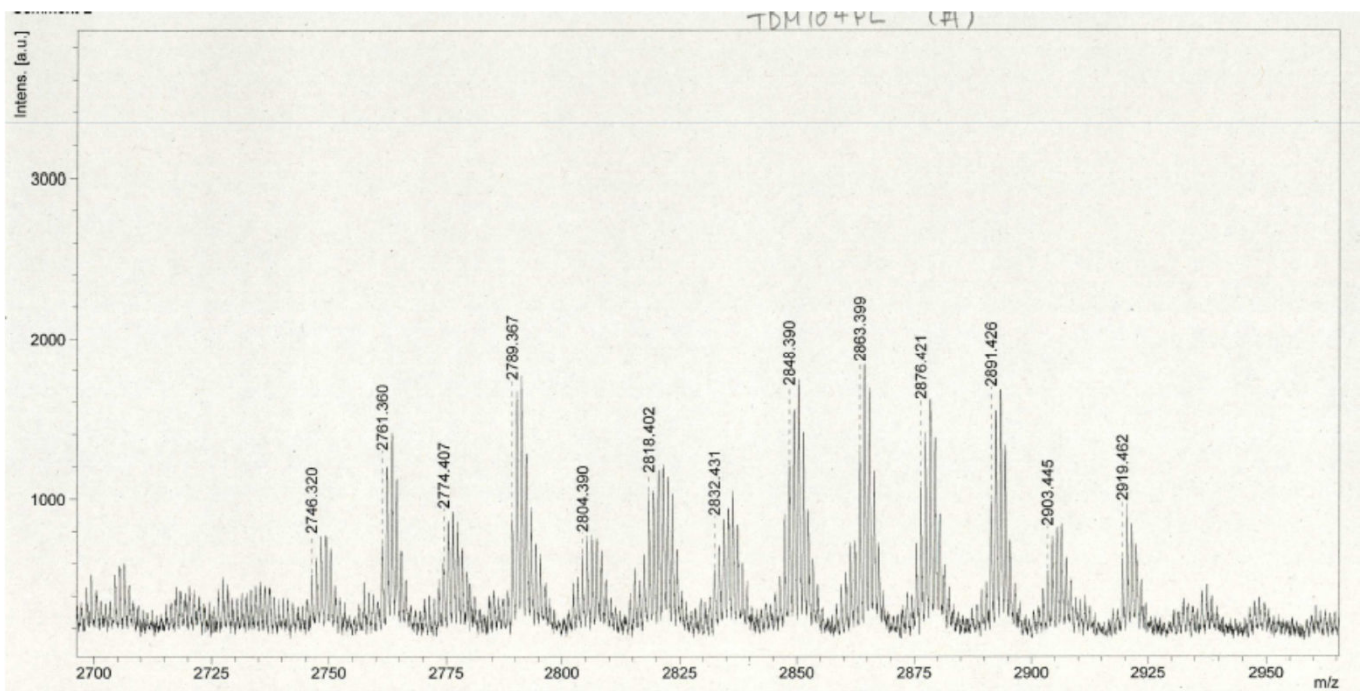

**Supplementary Fig. S7. Matrix-assisted laser desorption/ionization time-of-flight (MALDI-TOF) mass spectra of TDM.** (A,B) The samples extracted from spots #8 (A; MAH OCU 806) and #16 (B; MAH 104) on the TLC shown in **Supplementary Fig. S6** were analysed by a Ultraflex III-MALDI-TOF Mass Spectrometer (Bruker Daltonics; Leipzig, Germany) using 2,5-dihydroxybenzoic acid as a matrix in the positive ion mode. The obtained peak patterns were in agreement with the previous report by Fujita.

#### Reference

1. Fujita Y, Naka T, McNeil MR, Yano I. Intact molecular characterization of cord factor (trehalose 6,6'-dimycolate) from nine species of mycobacteria by MALDI-TOF mass spectrometry. *Microbiology*. 151, 3403-3416 (2005).

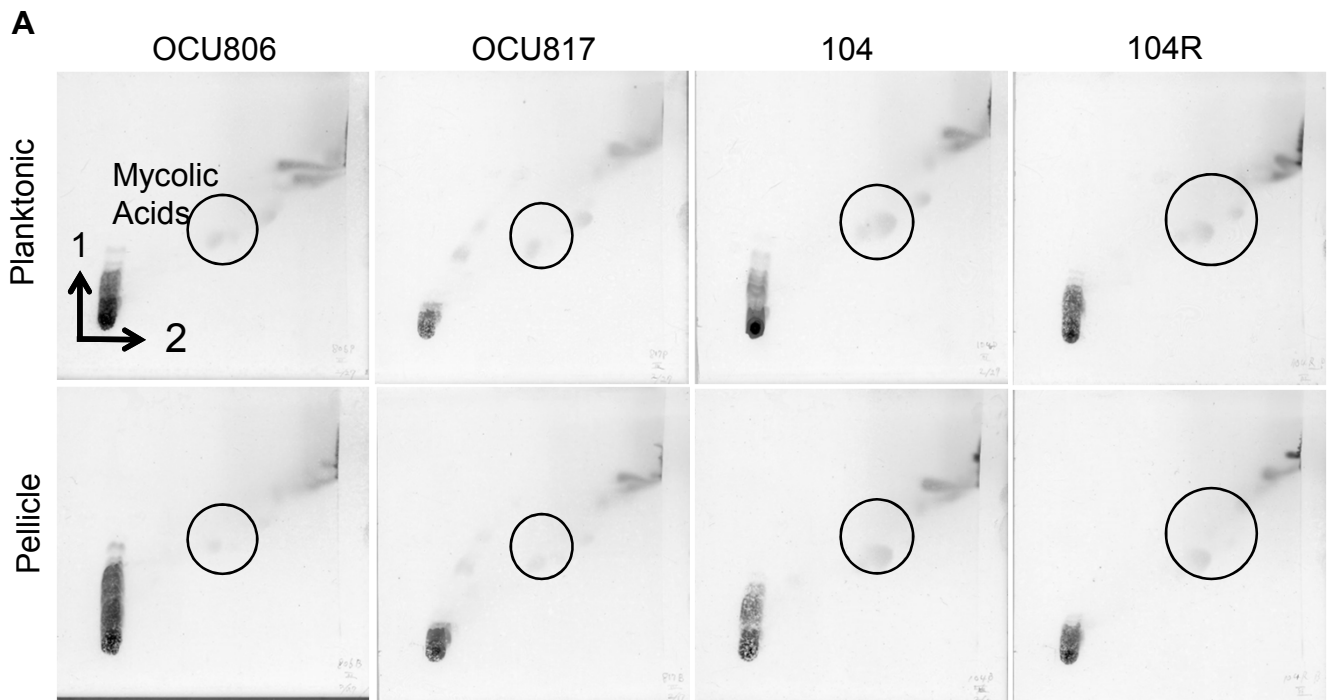

**Supplementary Fig. S8. Comparison of the amount of free mycolic acids between planktonic and pellicle bacteria.** The amount of total lipids derived from 1 mg of dried bacterial cells was applied to a 2D-TLC by using solvent system B (solvent 1; CHCl<sub>3</sub>:MeOH, 96:4 (v/v) for 20 min, solvent 2; toluene:acetone, 80:20 (v/v) for 20 min).

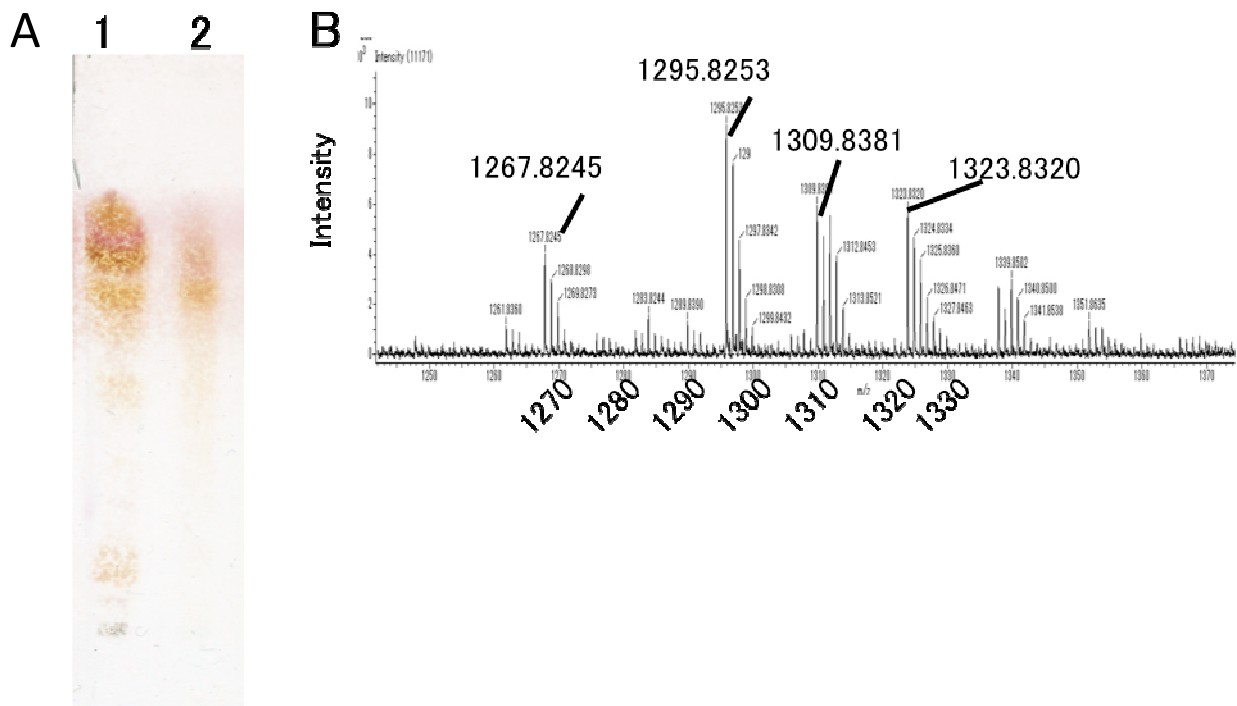

**Supplementary Fig. S9. Confirmation of purified GPL.** (A) Lipids of acetone soluble fraction (Lane 1) and purified GPL (Lane 2) extracted from MAH OCU806 on TLC. (B) Mass spectrum of purified GPL of MAH OCU806 obtained by ESI/MS. The separated spots on GPLs indicate difference in the number of acetyl groups at the hydroxyl sites of glycoside<sup>1</sup>. Apolar GPLs contain a lipopeptide core of C26-33 fatty acids amidated with D-Phe-D-alloThr-D-Ala-L-alaninol. The alloThr residue of this core is glycosylated with 6-deoxy- $\alpha$ -L-talose (dTal), and the alaninol residue is glycosylated with L-rhamnose (Rha). In addition, the C3 of the fatty acids is usually hydroxylated or methoxylated. Some apolar GPLs are *O*-methylated at the hydroxyl site of dTal (*O*-Me dTal)<sup>2</sup>. The purified GPLs are as follows; C26 fatty acyl mono *O*-acetylated GPL (m/z): [M+Na]<sup>+</sup> calcd. for C<sub>68</sub>H<sub>116</sub>N<sub>4</sub>O<sub>16</sub>Na, 1267.8284; found 1267.8245, C26 fatty acyl di-*O*-acetylated GPLs (m/z): [M+Na]<sup>+</sup> calcd. for C<sub>69</sub>H<sub>116</sub>N<sub>4</sub>O<sub>17</sub>Na, 1295.8233; found 1295.8253, C26 fatty acyl *O*-Me-di-*O*-acetylated GPLs (m/z): [M+Na]<sup>+</sup> calcd. for C<sub>70</sub>H<sub>118</sub>N<sub>4</sub>O<sub>17</sub>Na, 1309.8390; found 1309.8381, and C27 fatty acyl di-*O*-acetylated GPL (m/z): [M+Na]<sup>+</sup> calcd. for C<sub>71</sub>H<sub>120</sub>N<sub>4</sub>O<sub>17</sub>Na, 1323.8546; found 1323.8320.

## References

1. Nishiuchi Y, Kitada S, Maekura R. Liquid chromatography/mass spectrometry analysis of small-scale glycopeptidolipid preparations to identify serovars of *Mycobacterium avium-intracellulare* complex. *Appl Microbiol.* **97**, 738-48 (2004).
2. Pang L, Tian X, Pan W, Xie J. Structure and function of mycobacterium glycopeptidolipids from comparative genomics perspective. *J Cell Biochem.* **114**, 1705-13 (2013).
